# Supplementary material
Source: publisher site journal article supplement (https://www.dovepress.com/article/484136)
Supplement: Supplementary file 1 [file get_supplementary_file.php]

Supplementary Table 1. The scores on the 5 dimensions of negative life events in first-year university students without lifetime MDD by difference characteristics (N=7,390)

| Variables | Interpersonal relationships | | |  | Learning stress | | |  | Punishment | | |  | Health adaptation | | |  | Loss | | |  | NLEs | | |
| --- | --- | --- | --- | --- | --- | --- | --- | --- | --- | --- | --- | --- | --- | --- | --- | --- | --- | --- | --- | --- | --- | --- | --- |
| mean (SE) | t/F | *P* |  | mean (SE) | t/F | *P* |  | mean (SE) | t/F | *P* |  | mean (SE) | t/F | *P* |  | mean (SE) | t/F | *P* |  | mean (SE) | t/F | *P* |
| Avoids interpersonal occupational activities |  |  |  |  |  |  |  |  |  |  |  |  |  |  |  |  |  |  |  |  |  |  |  |
| Yes | 5.93 (3.76) | 19.162 | <0.05 |  | 7.41 (3.98) | 19.508 | <0.05 |  | 2.07 (3.02) | 9.382 | <0.05 |  | 4.08 (3.22) | 16.293 | <0.05 |  | 3.67 (3.86) | 12.521 | <0.05 |  | 23.09 (12.53) | 22.195 | <0.05 |
| No | 3.94 (3.28) |  | 5.23 (3.79) |  | 1.30 (2.43) |  | 2.62 (2.88) |  | 2.34 (3.19) |  | 15.35 (11.29) |
| Unwilling to get involved with people |  |  |  |  |  |  |  |  |  |  |  |  |  |  |  |  |  |  |  |  |  |  |  |
| Yes | 5.82 (3.81) | 15.556 | <0.05 |  | 7.08 (4.06) | 13.771 | <0.05 |  | 2.03 (3.11) | 7.594 | <0.05 |  | 4.10 (3.29) | 14.561 | <0.05 |  | 3.47 (3.86) | 8.970 | <0.05 |  | 22.48 (12.81) | 17.387 | <0.05 |
| No | 4.05 (3.33) |  | 5.39 (3.84) |  | 1.34 (2.44) |  | 2.68 (2.90) |  | 2.44 (3.24) |  | 15.82 (11.46) |
| Shows restraint within intimate relationships |  |  |  |  |  |  |  |  |  |  |  |  |  |  |  |  |  |  |  |  |  |  |  |
| Yes | 5.78 (3.82) | 17.694 | <0.05 |  | 7.23 (4.06) | 17.778 | <0.05 |  | 2.07 (3.15) | 9.382 | <0.05 |  | 3.88 (3.35) | 13.535 | <0.05 |  | 3.59 (3.91) | 11.850 | <0.05 |  | 22.44 (12.99) | 19.941 | <0.05 |
| No | 3.96 (3.27) |  | 5.25 (3.78) |  | 1.29 (2.37) |  | 2.65 (2.86) |  | 2.35 (3.16) |  | 15.43 (11.20) |
| Is preoccupied with being criticized or rejected |  |  |  |  |  |  |  |  |  |  |  |  |  |  |  |  |  |  |  |  |  |  |  |
| Yes | 5.63 (3.71) | 22.466 | <0.05 |  | 7.12 (3.96) | 23.064 | <0.05 |  | 2.01 (3.01) | 12.470 | <0.05 |  | 3.76 (3.28) | 16.591 | <0.05 |  | 3.41 (3.79) | 13.819 | <0.05 |  | 21.87 (12.57) | 25.439 | <0.05 |
| No | 3.69 (3.16) |  | 4.94 (3.70) |  | 1.17 (2.27) |  | 2.49 (2.77) |  | 2.21 (3.07) |  | 14.42 (10.81) |
| Inhibited in new interpersonal situations |  |  |  |  |  |  |  |  |  |  |  |  |  |  |  |  |  |  |  |  |  |  |  |
| Yes | 5.54 (3.72) | 17.695 | <0.05 |  | 7.11 (3.97) | 19.707 | <0.05 |  | 1.88 (2.89) | 8.293 | <0.05 |  | 3.79 (3.27) | 14.886 | <0.05 |  | 3.45 (3.80) | 12.411 | <0.05 |  | 21.67 (12.43) | 20.963 | <0.05 |
| No | 3.90 (3.27) |  | 5.13 (3.77) |  | 1.29 (2.43) |  | 2.58 (2.84) |  | 2.30 (3.14) |  | 15.13 (12.28) |
| Views self as socially inept |  |  |  |  |  |  |  |  |  |  |  |  |  |  |  |  |  |  |  |  |  |  |  |
| Yes | 5.68 (3.83) | 16.117 | <0.05 |  | 7.13 (4.08) | 16.388 | <0.05 |  | 1.99 (2.98) | 8.384 | <0.05 |  | 3.74 (3.22) | 11.776 | <0.05 |  | 3.51 (3.76) | 11.115 | <0.05 |  | 21.94 (12.56) | 18.327 | <0.05 |
| No | 4.00 (3.29) |  | 5.29 (3.79) |  | 1.31 (2.44) |  | 2.70 (2.92) |  | 2.38 (3.23) |  | 15.61 (11.44) |
| Unusually reluctant to engage in any new activities |  |  |  |  |  |  |  |  |  |  |  |  |  |  |  |  |  |  |  |  |  |  |  |
| Yes | 5.44 (3.96) | 7.287 | <0.05 |  | 6.80 (4.19) | 7.037 | <0.05 |  | 1.83 (2.99) | 3.317 | <0.05 |  | 4.34 (3.40) | 11.144 | <0.05 |  | 3.34 (3.89) | 4.903 | <0.05 |  | 21.76 (13.26) | 9.593 | <0.05 |
| No | 4.26 (3.42) |  | 5.59 (3.89) |  | 1.43 (2.54) |  | 2.80 (2.95) |  | 2.56 (3.33) |  | 16.55 (11.76) |
| Number of AVPD features |  |  |  |  |  |  |  |  |  |  |  |  |  |  |  |  |  |  |  |  |  |  |  |
| 0 | 3.37 (3.05) | 372.467 | <0.05 |  | 4.54 (3.60) | 363.936 | <0.05 |  | 1.07 (2.19) | 92.440 | <0.05 |  | 2.23 (2.67) | 235.733 | <0.05 |  | 1.95 (2.90) | 166.167 | <0.05 |  | 13.07 (10.45) | 482.984 | <0.05 |
| 1-3 | 4.79 (3.35) |  | 6.28 (3.81) |  | 1.64 (2.69) |  | 3.24 (3.02) |  | 2.93 (3.47) |  | 18.84 (11.53) |
| 4-7 | 6.15 (3.89) |  | 7.57 (4.03) |  |  | 2.12 (3.11) |  | 4.17 (3.35) |  | 3.80 (3.94) |  | 23.71 (12.75) |
